# Supplementary material
Source: publisher figshare collection journal article supplement (https://acs.figshare.com/ndownloader/files/4471924)

## Supporting Information.

### Legends to Figures S1-S5

#### **Figure S1. pH-dependence of cytochrome *c* oxidase activity of N139L mutant and wild type oxidase from *R. sphaeroides*.**

Cytochrome oxidase activity was measured at different pH values following oxygen consumption with a Clark-type electrode as described in “Materials and Methods”. *Filled squares*, wild type enzyme. *Open squares*, N139L mutant. *Open circles*, the data for N139L have been normalized to the activity of the wild type enzyme (dividing by the average inhibition value of 7%) in order to facilitate visual comparison of the pH dependencies. See “Materials and Methods” for the conditions.

#### **Figure S2. Proton-pumping measurements with N139L mutant (A) and wild type (B) cytochrome *c* oxidase from *R. sphaeroides*.**

For the conditions, see “Materials and Methods”. The arrows labeled as  $H^+$  indicate acidification induced by addition of 10  $\mu$ l of 1 mM HCl (10 nmol) to the cell.  $O_2$  additions, 2.5 nmol. In case of the curves 2, 30  $\mu$ M carbonyl cyanide *m*-chlorophenyl hydrazone (CCCP), the uncoupler, was also present.

#### **Figure S3. Deconvolution of the kinetics of heme *a* reoxidation in the wild type oxidase.**

Fitting of the heme *a* reoxidation kinetics has been performed by two different protocols, as described below. 36 individual traces have been averaged to provide for good signal-to-noise ratio. A single-exponential approximation gave very poor results (not shown). **Figure S3,A** shows 2 exponential deconvolution made as in our previous work (1). Although the fit is reasonably good, there is an obvious shortcoming of such deconvolution: - neither the time

constants nor the relative magnitudes of the two components match the characteristics of the two phases of  $\Delta\psi$  generation coupled to the reoxidation of heme *a* (cf. ref. 1 and **Table 2**). Therefore, an alternative fitting procedure has been used (**Figure S3, B**), assuming that the phases of heme *a* reoxidation, monitored optically, are related to the proton transfer phases in the kinetics of  $\Delta\psi$  generation measured electrometrically (cf. **Table 2**). In case of the wild type oxidase, the signal-to-noise ratio is very much better for the electrometric curves as compared to the absorption traces (e.g., cf. **Figure 5**). Therefore, the fitting of the absorption traces was performed by setting fixed lifetimes for the two major components of heme *a* reoxidation, choosing the  $\tau$  values from the deconvolution of the electrometric curves ( $\tau_1 \sim 0.4$  ms and  $\tau_2 \sim 1.6$  ms, **Table 2**). With these  $\tau$  values, a very good fit can be obtained for the absorption trace, provided a minor third slow component with  $\tau > 8$  ms and contribution of 5-15% is included. An example of such fitting is shown in **Figure S3,B** and the results are given in **Table 1**. A plot of the residuals and other fitting parameters in **Figure S3,B** are slightly but noticeably better than for the 2 exponential fit in **Figure S3,A**, but, what is more important, the amplitude ratio of the 0.4 ms and 1.6 ms phases of heme *a* reoxidation found with the new protocol, becomes close to the amplitude ratio of the 0.4 ms and 1.6 ms resolved for the electrogenic phases. The minor component with  $\tau$  of 8-10 ms is too slow for the wild type oxidase turnover and may correspond to a small fraction of damaged enzyme (cf. the 5-10% of the slowly oxidizing wild type enzyme in **Figure 1A**).

**Figure S4. Comparison of the electrogenic responses coupled to the photoinduced F  $\rightarrow$  O transition in the wild type, N139D and N139L mutant forms of cytochrome oxidase from *R. sphaeroides*.**

Experiments with collodion film-adhered liposomes with COX have been carried out in the buffer containing 5 mM Tris-acetate, pH 8, with 40  $\mu$ M RuBpy and 10 mM aniline as the photoreducing system. 2 mM H<sub>2</sub>O<sub>2</sub> was added to convert COX to the ferryl-oxo state prior to the

flash. The traces have been normalized by the magnitude of the microsecond KCN-insensitive part of the response.

**Figure S5. Resolution of the cyanide-sensitive slow phase of membrane potential generation coupled to the photoinduced F→O transition in N139L mutant oxidase.**

As shown in **Figure S4**, the rapid microsecond phase of  $\Delta\psi$  generation in the N139L mutant oxidase, is not followed by any significant additional electrogenic phase(s) in the conventional ~10 ms time window, in which the electrogenic protonic phases of the wild type enzyme and N139D mutant are fully developed. However, it is well known that with the electrometric technique, low-amplitude slow phases of membrane potential generation (tens of milliseconds or slower) can be masked by passive discharge of  $\Delta\psi$  (e.g., (2, 3)). The passive discharge is a multiphasic process that may take up to several seconds for completion. **Figure S5** compares the photoelectric responses of the N139L mutant at a slower sweep in the absence (trace *a*) and in the presence of cyanide (trace *b*). It can be seen that the addition of KCN to N139L mutant oxidase enhances markedly  $\Delta\psi$  decay that follows the microsecond phase of  $\Delta\psi$  generation (cf. traces *a* and *b* in **Figure S5**). Subtracting trace *b* taken in the presence of KCN from trace *a* taken in the absence of KCN allows to elicit a slow KCN-sensitive phase of membrane potential generation (trace *c*) inherent in the electrogenic response of the N139L oxidase. The phase corresponds to low-magnitude vectorial charge movement, most probably  $H^+$  transfer, linked to the KCN-sensitive electron transfer from heme *a* to the binuclear center (see the text and **Figure 10**). Trace *d* simulates protonic phase of  $\Delta\psi$  generation that should be observed if E286, after donating proton to the binuclear site (cf. **Figures 8-10**), were reprotonated from the N-phase with  $k = 2\text{ s}^{-1}$ , corresponding to the rate of the F→O transition during the oxidation of the fully reduced N139L oxidase by oxygen (cf. **Figures 2, 8B, 9** and relevant text in Discussion).

Conditions: (*a*) as in **Figure S4**; (*b*) after addition of 0.5 mM KCN. In (*b*), 200  $\mu\text{M}$

ferricyanide was also present to prevent spontaneous reduction of heme *a* in the cyanide-inhibited oxidase by endogenous electron donors.

## REFERENCES

1. Siletsky, S. A., Pawate, A. S., Weiss, K., Gennis, R. B., and Konstantinov, A. A. (2004) Transmembrane charge separation during the ferryl-oxo → oxidized transition in a non-pumping mutant of cytochrome *c* oxidase. *J. Biol. Chem* 279, 52558-52565.
2. Gupta, O. A., Feniouk, B. A., Junge, W., and Mulkidjanian, A. Y. (1998) The cytochrome *bc*<sub>1</sub> complex of *Rhodobacter capsulatus*: Ubiquinol oxidation in a dimeric Q-cycle?, *FEBS Lett* 431, 291-296.
3. Mamedov, M. D., Tyunyatkina, A. A., Siletsky, S. A., and Semenov, A. Y. (2006) Voltage changes involving photosystem II quinone-iron complex turnover. *Eur Biophys J* 35, 647-654.

# Figure S1

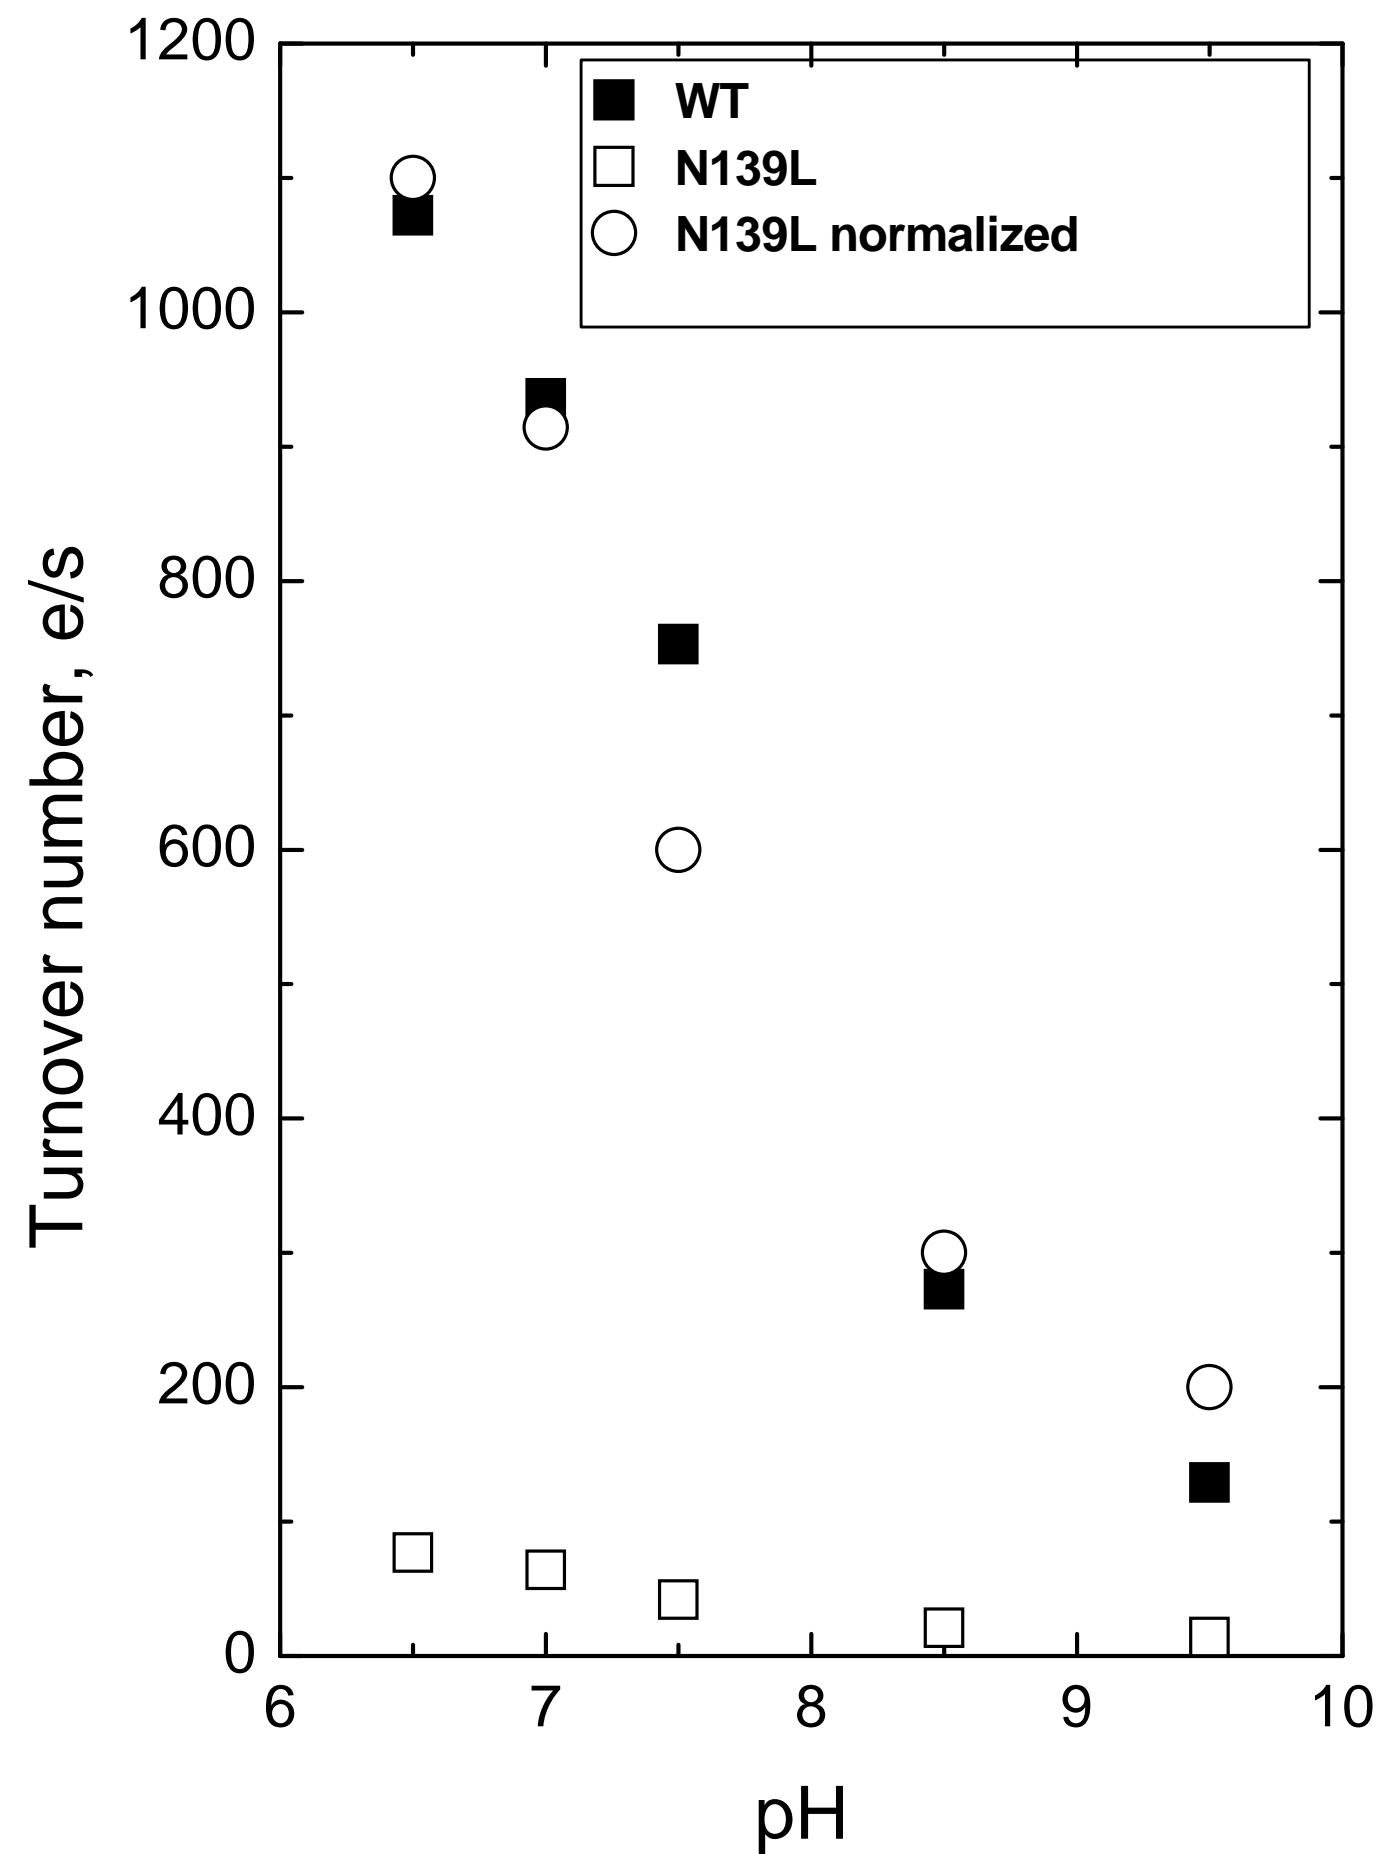

Figure S2

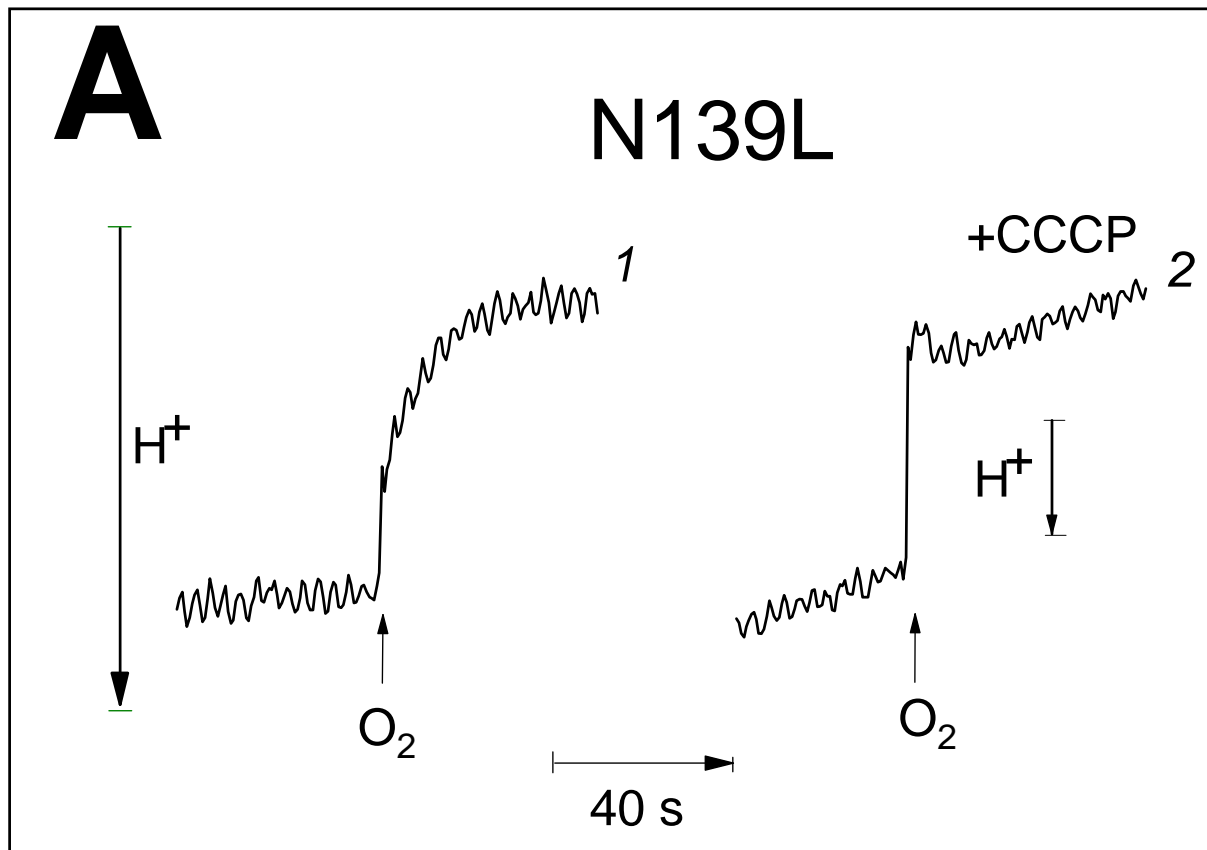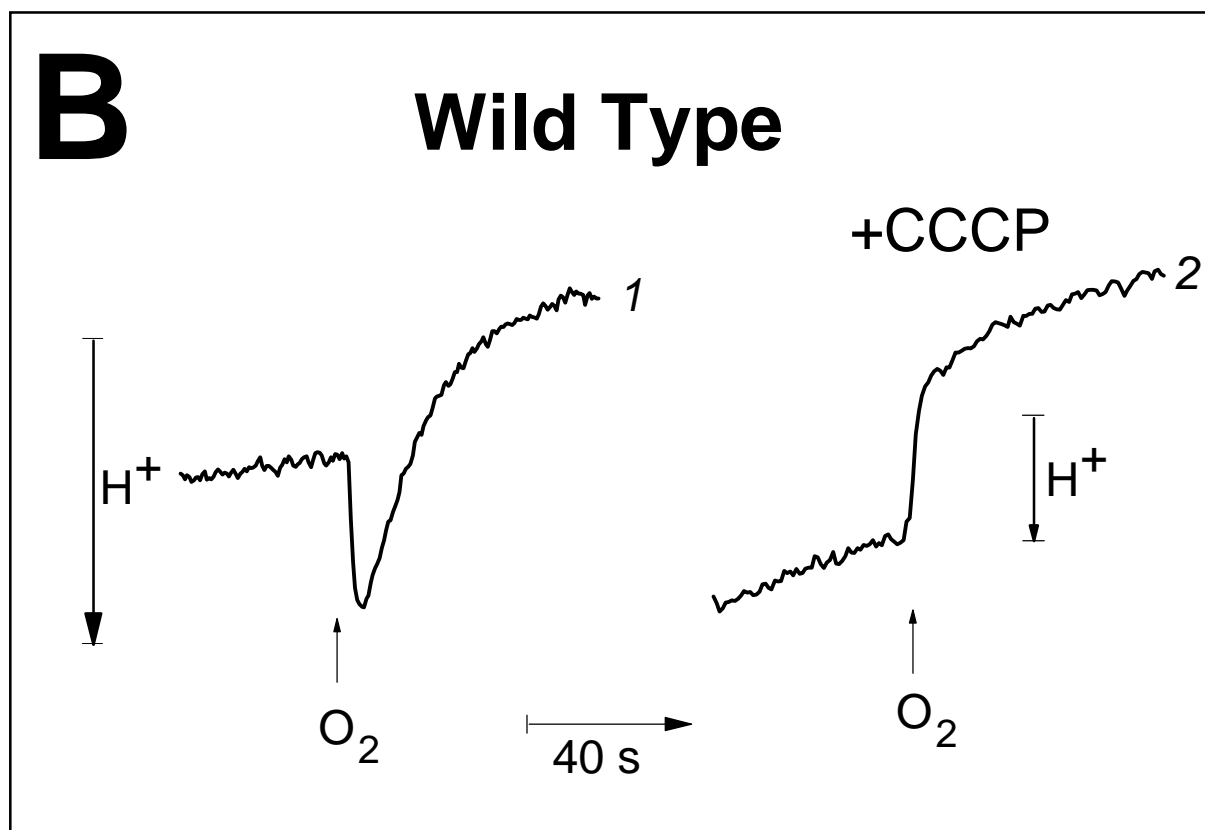

Figure S3

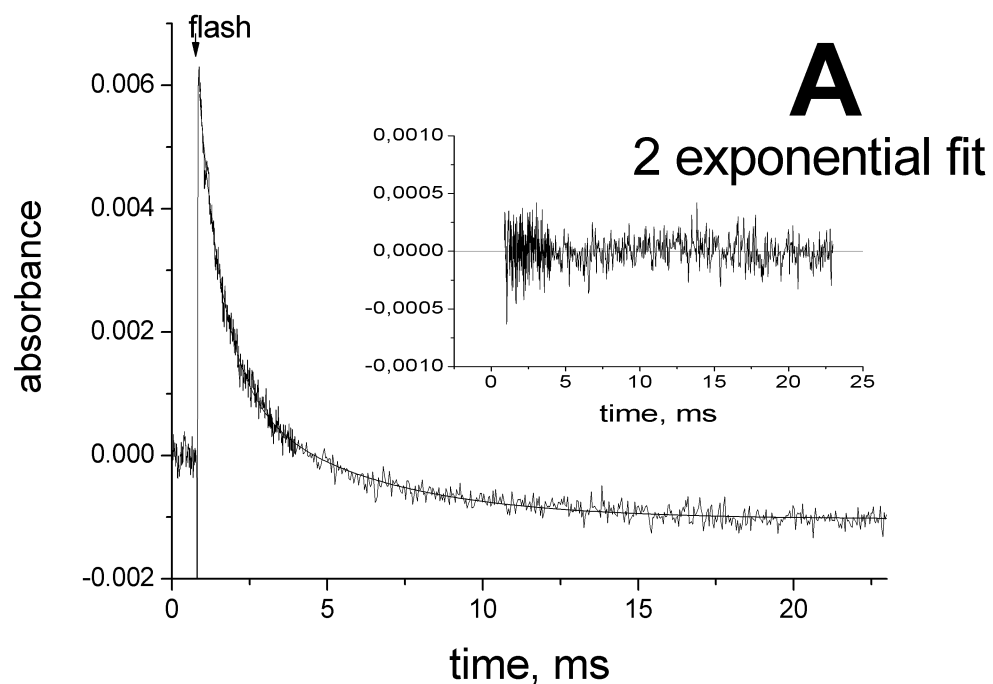

$\chi^2/\text{DoF} = 1.9974\text{E}-8$   
 $R^2 = 0.99234$   
 $A_1 = 0.00457 \pm 0.00008$   
 $\tau_1 = 0.76675 \pm 0.02003$   
 $A_2 = 0.00232 \pm 0.00008$   
 $\tau_2 = 4.37135 \pm 0.20021$

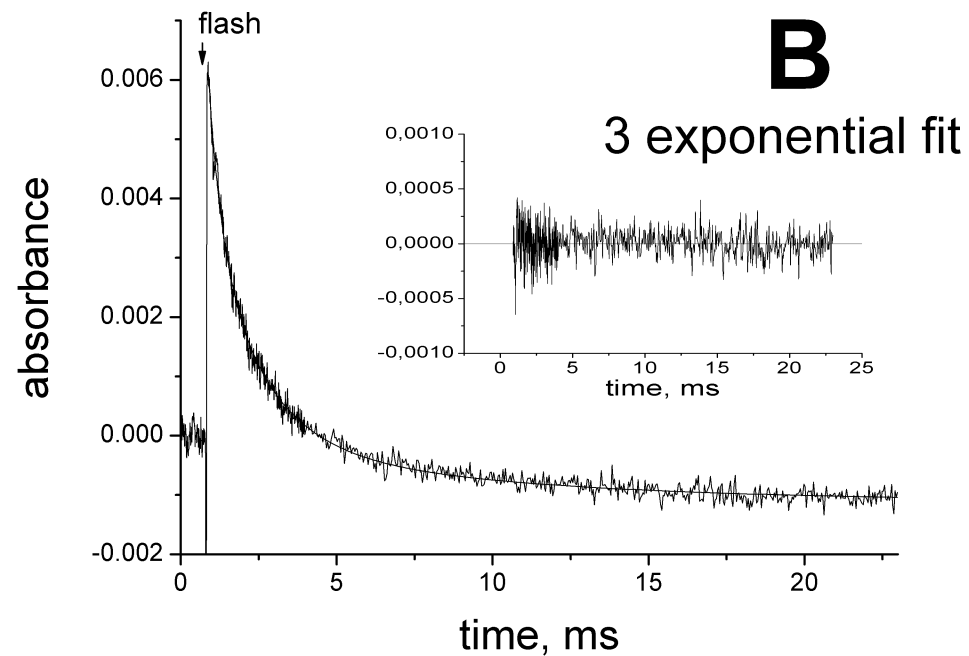

$\chi^2/\text{DoF} = 1.991\text{E}-8$   
 $R^2 = 0.99236$   
 $A_1 = 0.00235 \pm 0.00006$   
 $\tau_1 = 0.4$   
 $A_2 = 0.00375 \pm 0.00006$   
 $\tau_2 = 1.6$   
 $A_3 = 0.00109 \pm 0.00004$   
 $\tau_3 = 8$

Figure S4

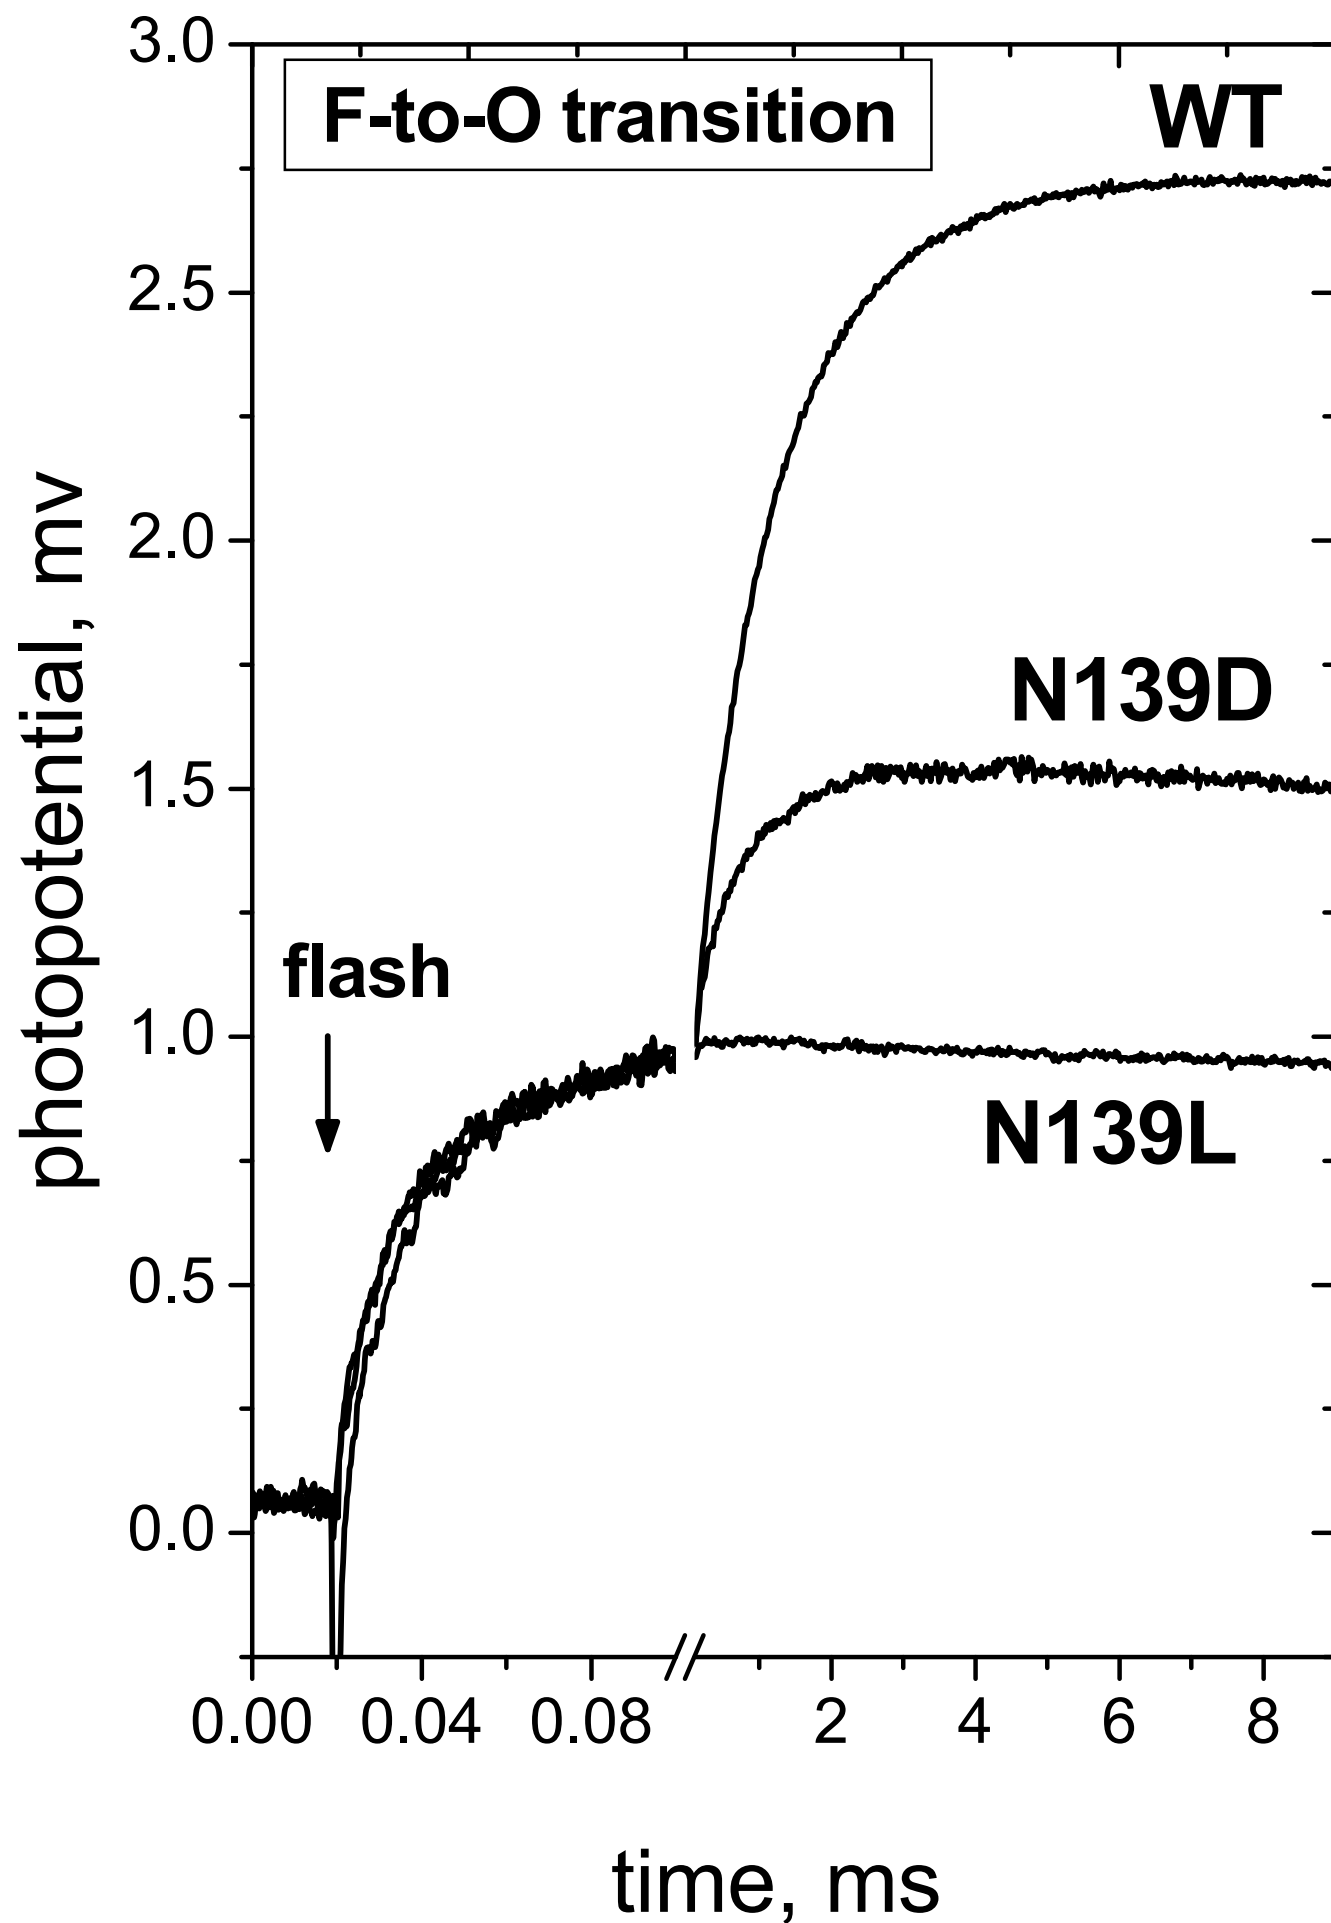

**Figure S5**

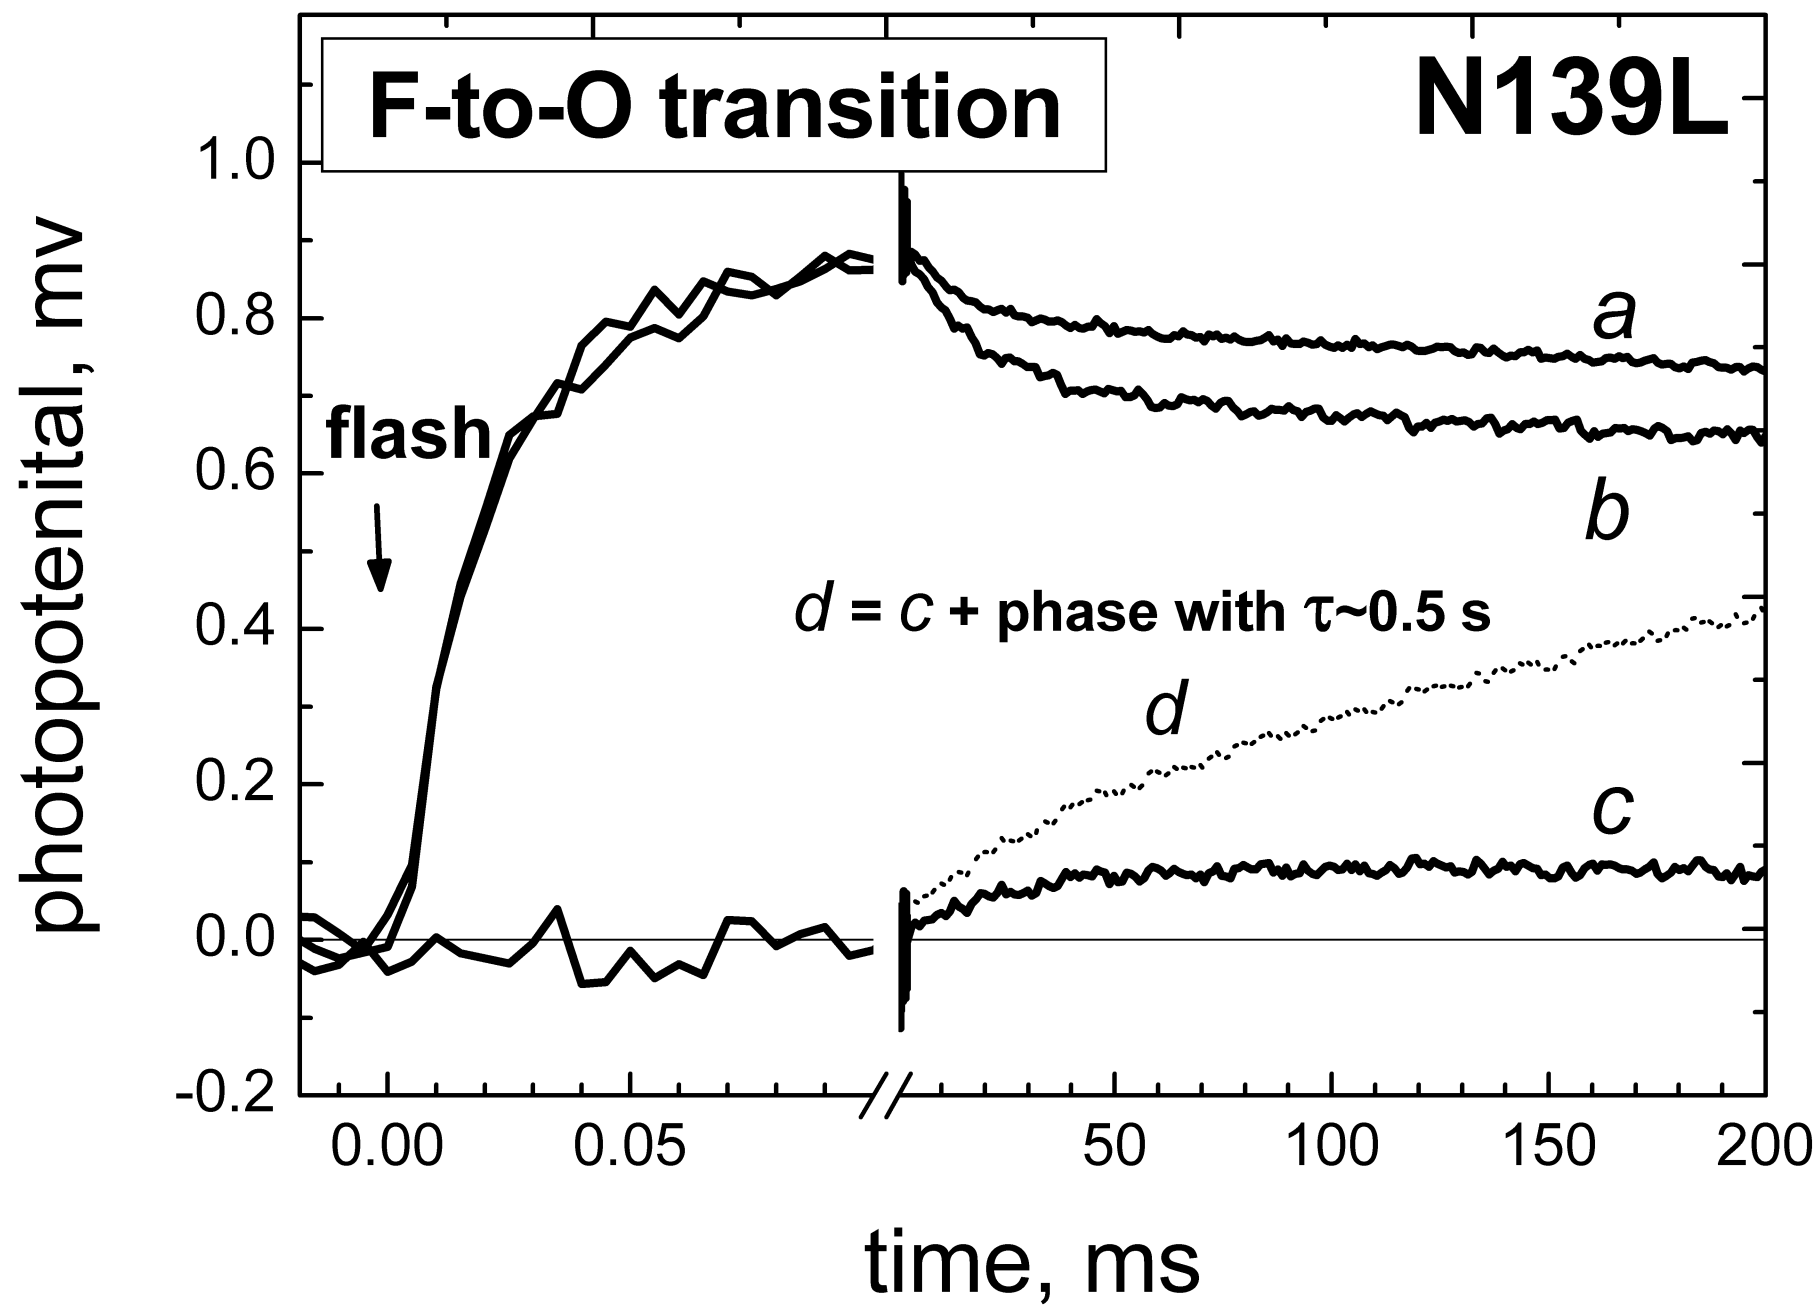

Supplement: Supplementary file 1 [file 4471924]
